# Supplementary material
Source: PubMed Central journal article supplement (PMC6268196)
Supplement: NIHMS987794-supplement-S1.pdf [file NIHMS987794-supplement-S1.pdf]

4 **Figure S1.** Mouse CatSper sequences (mCS1-4) in the transmembrane region  
 5 aligned to the *Arcobacter butzleri* voltage-gated calcium channel crystal structure  
 6 (4MS2), the mouse T-type voltage-gated calcium channel (CAV3.2), which is  
 7 mechanosensitive, and electric eel NaV1.1 (5XSY), which structure matches  
 8 4MS2. TM segments and P-loop are indicated.

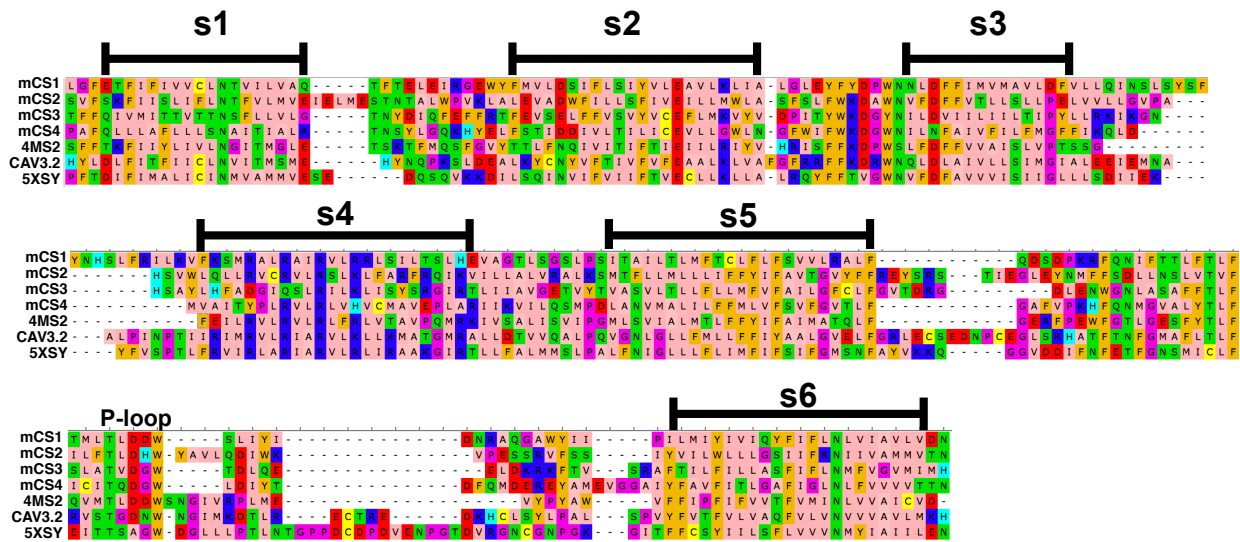

9
