# Supplementary material
Source: PubMed Central journal article supplement (PMC6268196)

**Figure S3.** C-terminal sequences from 38 mammalian CatSper  $\delta$ 's are poorly conserved, but consistently cysteine-rich. 74% of species have the CxxC or CxC motif. African elephant lacks the C-terminal extension but has the motif at another location. Mouse numbering.

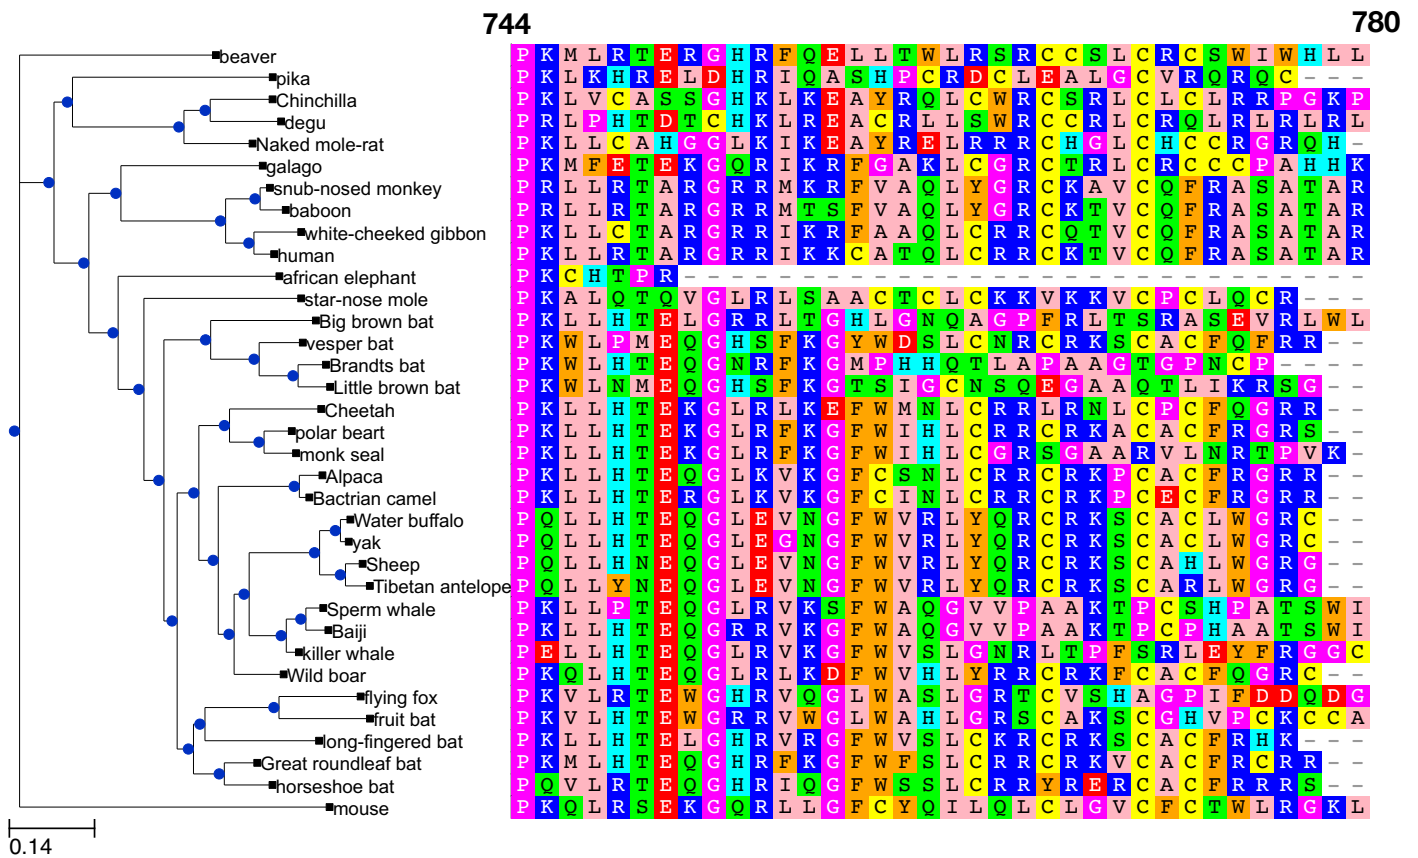

Supplement: NIHMS987794-supplement-S3.pdf [file NIHMS987794-supplement-S3.pdf]
