# Supplementary material
Source: PubMed Central journal article supplement (PMC6268196)

53

54 **Figure S7.** The presence of a “lipid portal” between P-domains of the ion channel sug-  
55 gests a means by which the lipid 2AG may inhibit CatSper activity. (a) Subunit interac-  
56 tions as viewed from the membrane bilayer shows openings large enough to allow pas-  
57 sage of lipids. (b) Close-up view of lipid portal. (c) Result of interactive docking of 2AG  
58 to the central chamber of CatSper through the lipid portal. (d) Close-up stereo view of 2-  
59 AG docked to central chamber showing surface complementarity.

60

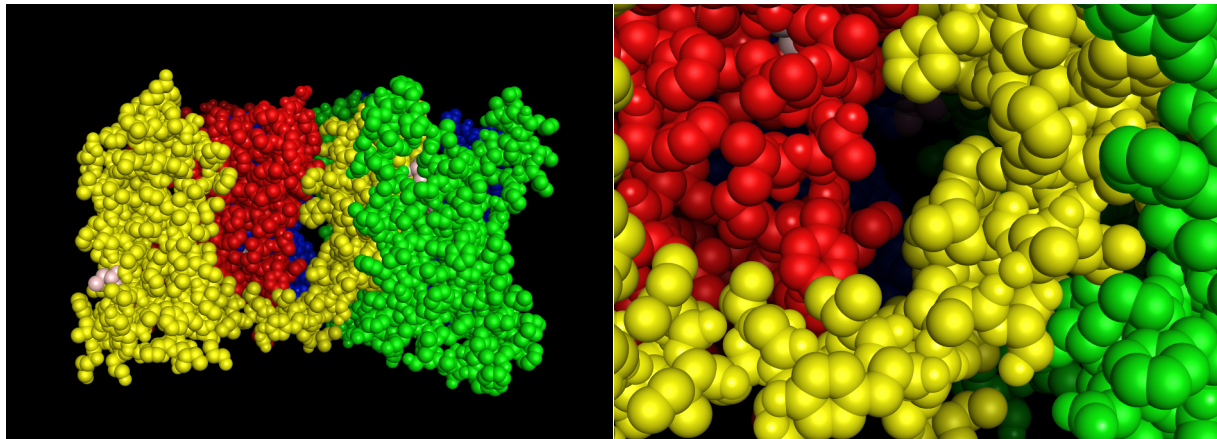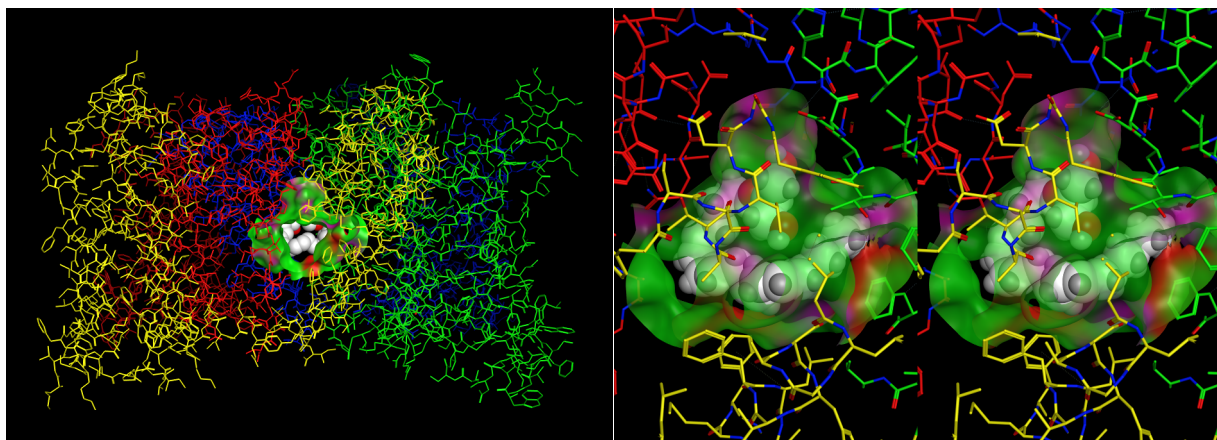

Supplement: NIHMS987794-supplement-S7.pdf [file NIHMS987794-supplement-S7.pdf]
